# Supplementary material for: TRPV1 acts as a Tumor Suppressor and is associated with Immune Cell Infiltration in Clear Cell Renal Cell Carcinoma: evidence from integrated analysis
Source: PubMed Central journal article supplement (PMC7477432; doi:10.7150/jca.45918), 2020-07-25
Supplement: jcav11p5678s1.pdf [file jcav11p5678s1.pdf]

**Supplementary Figures Legends:**

**Supplementary Figure 1 TRPV1 expression in GSE781.**

**Supplementary Figure 2 Subgroup analysis of TRPV1 expression in ccRCC.** (A) Grouped by stages in GSE6344. Grouped by grades (B) and stages (C) in tissue chip (BC07014a).

**Supplementary Figure 3. Correlation of immune cells infiltration and survival in ccRCC.** (A) 1 year; (B) 3 years; (C) 5 years; (D) 10 years. The red line represents high infiltration of immune cells, while the blue represents low infiltration.

**Supplementary Figure 4. Correlations between TRPV1 expression and cumulative survival in each ccRCC immune subsets.** (A) 1 year; (B) 3 years; (C) 5 years; (D) 10 years. The red line represents high expression of TRPV1, while the blue represents low expression.

**Supplementary Figure 5. Correlation of TRPV1 expression with other key molecules of different pathways.**

# GSE781

Relative TRPV1 mRNA Expression

500  
400  
300  
200  
100  
0

$P < 0.091$

NT

ccRCC

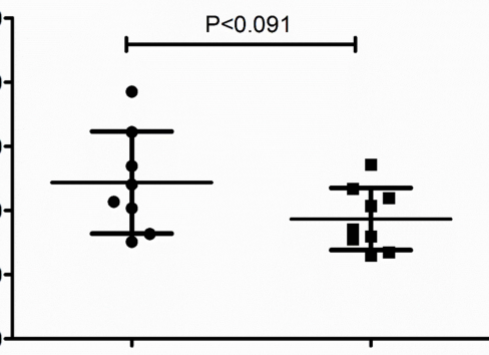

**GSE6344**

TRPV1 mRNA Expression

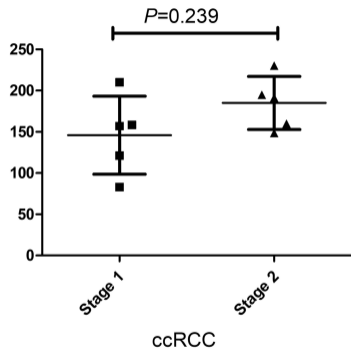**A**

TRPV1 IHC Score

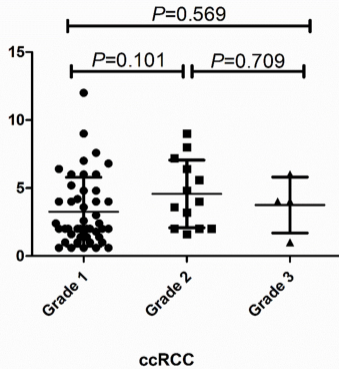**B**

TRPV1 IHC Score

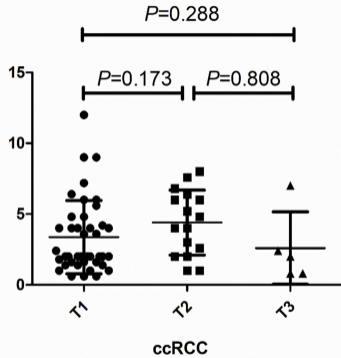**C**

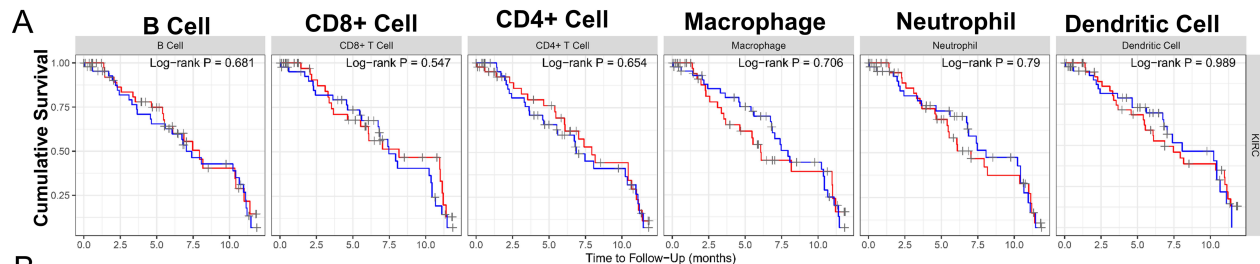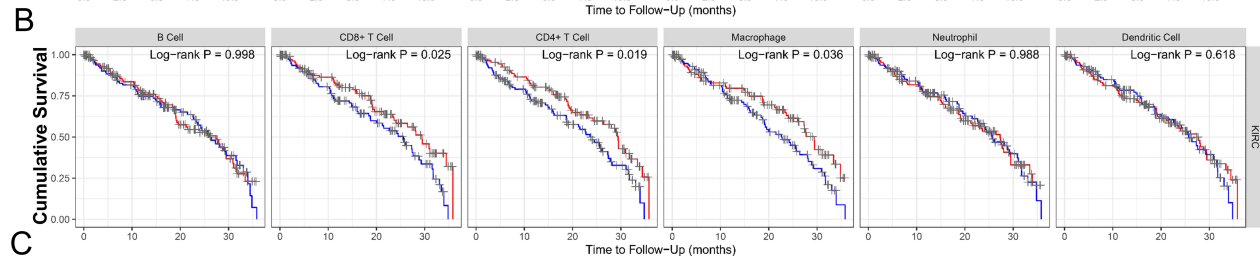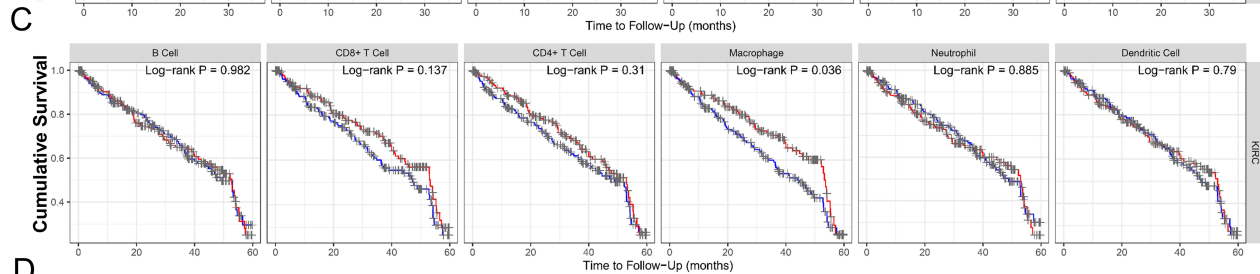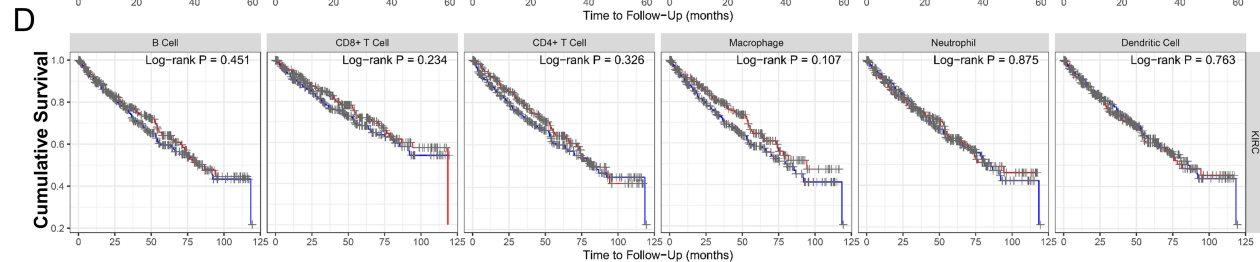

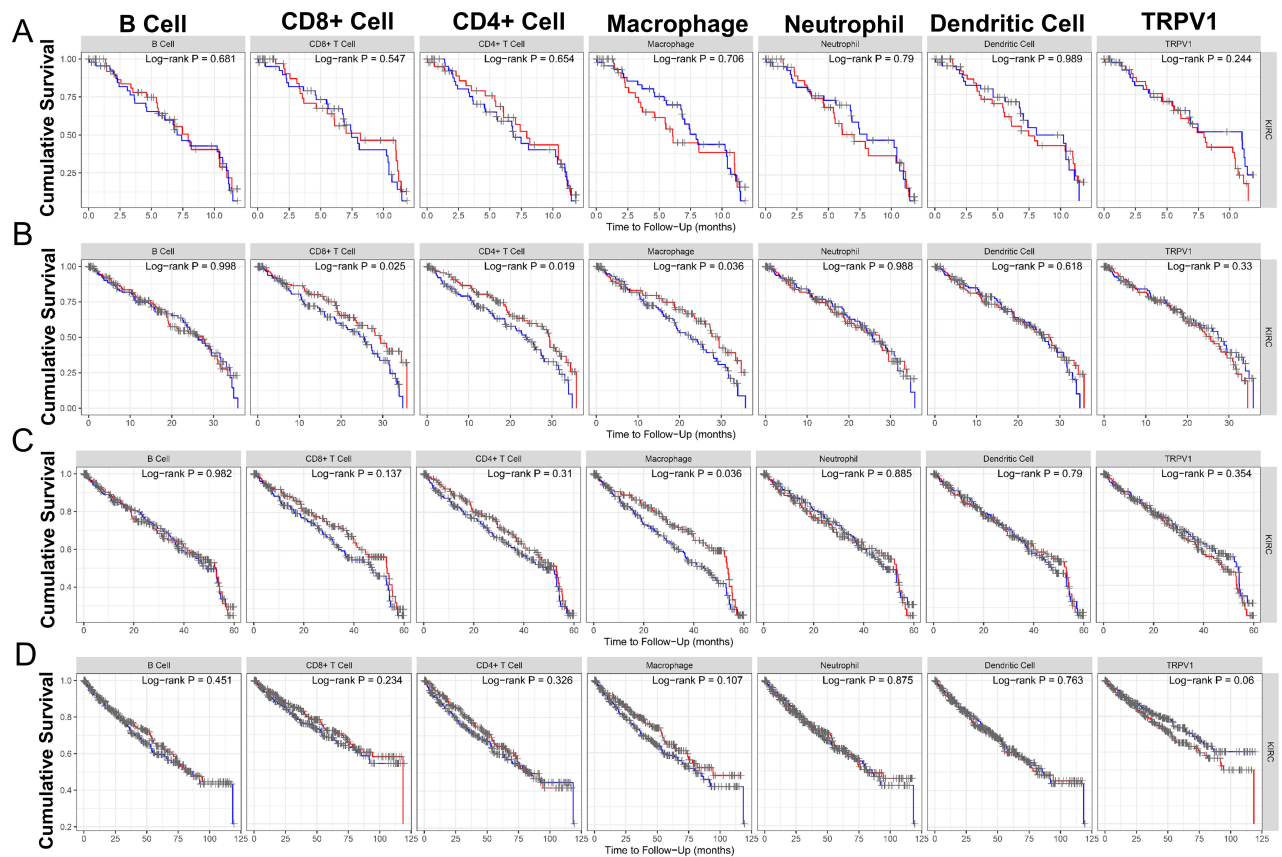

Gene Expression Level (log2 RSEM)

WNT5A

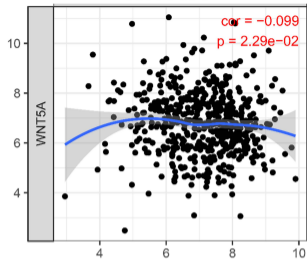

WNT2

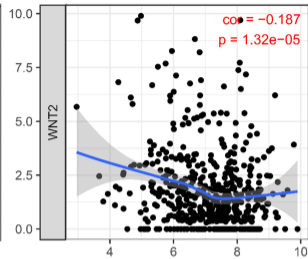

WNT3A

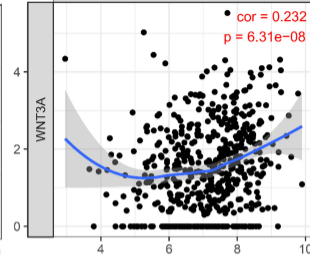

WNT1

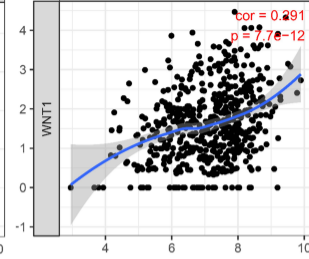

AKT1

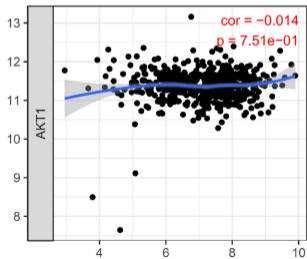

PTEN

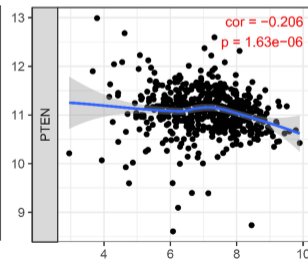

VEGFA

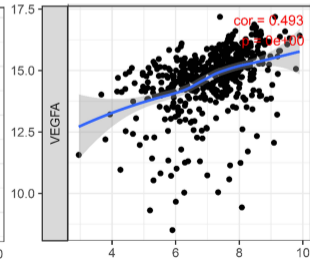

TRPV1 Expression Level (log2 RSEM)
